# Supplementary material for: On the electronic structure and conflicting d-orbital aromaticity in the Re3O3− cluster
Source: Royal Society of Chemistry journal article supplement (doi:10.1039/c2ra00753c), 2012-01-01
Supplement: c2ra00753c.pdf [file c2ra00753c.pdf]

## Electronic Supplementary Information

### On the Electronic Structure and Conflicting d-Orbital Aromaticity in the $\text{Re}_3\text{O}_3^-$ Cluster

Hua-Jin Zhai,<sup>†</sup> Wen-Jie Chen,<sup>‡,§</sup> Xin Huang,<sup>‡,§</sup> and Lai-Sheng Wang<sup>†</sup>

<sup>†</sup> *Department of Chemistry, Brown University, Providence, Rhode Island 02912, United States*

<sup>‡</sup> *Department of Chemistry, Fuzhou University, Fuzhou, Fujian 350108, P. R. China*

<sup>§</sup> *State Key Laboratory of Structural Chemistry, Fuzhou, Fujian 350002, P. R. China*

**Molecular Orbital Analyses** for the high-lying  $\text{Re}_3\text{O}_3^- D_{3h}$  structures.

**Figures S1-S2.** Alternative optimized structures for  $\text{Re}_3\text{O}_3^-$  and  $\text{Re}_3\text{O}_3$  at the B3LYP/Re/Stuttgart+2f1g/O/aug-cc-pVTZ level.

**Figure S3.** Molecular orbital pictures for the  $\text{Re}_3\text{O}_3^- D_{3h} (^3A_1')$  structure, which lies 3.06 eV above the global minimum at B3LYP/Re/Stuttgart+2f1g/O/aug-cc-pVTZ level.

**Figure S4.** Molecular orbital pictures for the  $\text{Re}_3\text{O}_3^- D_{3h} (^1A_1')$  structure, which lies 5.36 eV above the global minimum at B3LYP/Re/Stuttgart+2f1g/O/aug-cc-pVTZ level.

**Table S1.** Cartesian coordinates for all optimized structures for  $\text{Re}_3\text{O}_3^-$  and  $\text{Re}_3\text{O}_3$  at B3LYP/Re/Stuttgart+2f1g/O/aug-cc-pVTZ level.

## Molecular Orbital Analyses for the High-Lying $\text{Re}_3\text{O}_3^- D_{3h}$ Structures

The highly symmetric  $\text{Re}_3\text{O}_3^- D_{3h}$  ( $^3A_1'$ ) and  $D_{3h}$  ( $^1A_1'$ ) structures (Figures S3 and S4) seem to be tempting candidates to account for the vibrationally-resolved photoelectron spectrum (Figure 1a), which hints relatively high symmetry for both the anion and neutral clusters. This hypothesis turns out to be wrong, in terms of both their energetics and their simulated PES spectra (Figure 3d and 3e). Thus a critical question arises: Why are these  $D_{3h}$  structures so much higher in energy relative to the  $C_{2v}$  ( $^1A_1$ ) global minimum (Figure 2a)?

A three-center transition metal system in principle is capable of forming four completely bonding (two  $\sigma$ -, one  $\pi$ -, and one  $\delta$ -) MOs.<sup>S1,S2</sup> Ideally all these MOs need to be filled in order for a  $\text{Re}_3\text{O}_3^-$  structure to be stable. However, the  $D_{3h}$  structures each possess only three completely bonding MOs, and the two additional electrons that are supposed to occupy the missing  $\sigma$ -MO are forced to occupy the antibonding MOs instead.

To be specific, HOMO-5 ( $1a_1'$ ) and HOMO-1 ( $1e'$ ) of the  $D_{3h}$  ( $^3A_1'$ ) structure (Figure S3) represent the  $\sigma/\sigma^*$  combination and HOMO-2 ( $1a_2''$ ) and HOMO-3 ( $1e''$ ) represent the  $\pi/\pi^*$  combination. These MOs can be roughly localized as three (albeit weak) Re=Re double bonds. The remaining HOMO-4 ( $2a_1'$ ) and half-occupied HOMO ( $2e'$ ) collectively render  $\delta$  aromaticity for this species, according to the reversed  $4n$  Hückel aromaticity rule for triplet coupled electrons. Overall, the Re-Re bonding (2.424 Å) in  $D_{3h}$  ( $^3A_1'$ ) is slightly weaker than typical Re=Re double bonds (2.38 Å).<sup>S3</sup>

For the  $D_{3h}$  ( $^1A_1'$ ) structure (Figure S4), the HOMO-5 ( $1a_1'$ ) and HOMO-2 ( $1e'$ ) form the  $\sigma$  framework and may be considered as three Re-Re  $\sigma$ -bonds, which are largely canceled by the net antibonding nature of the  $\pi$  framework: HOMO-4 ( $1a_2''$ ), HOMO-1 ( $1e''$ ), and HOMO ( $1a_1''$ ). The remaining completely bonding HOMO-3 ( $2a_1'$ ) renders  $\delta$ -aromaticity to this species. Not surprisingly, the net Re-Re bonding (2.699 Å) in  $D_{3h}$  ( $^1A_1'$ ) is even weaker than typical Re-Re single bonds (2.62 Å),<sup>S3</sup> commensurate with its energetic instability.

In contrast to these high-lying  $D_{3h}$  structures, all four bonding MOs are fully occupied in the  $C_{2v}$  ( $^1A_1$ ) global minimum, and in addition the structural distortion to  $C_{2v}$  poses extra

stabilization to the corresponding  $\sigma^*$  and  $\pi^*$  MOs.

### References:

- (S1) Averkiev, B. B.; Boldyrev, A. I. Hf<sub>3</sub> Cluster Is Triply ( $\sigma$ -,  $\pi$ -, and  $\delta$ -) Aromatic in the Lowest  $D_{3h}$ ,  $^1A_1'$  State. *J. Phys. Chem. A* **2007**, *111*, 12864–12866.
- (S2) Zhai, H. J.; Wang, B.; Huang, X.; Wang, L. S. Structural Evolution, Sequential Oxidation, and Chemical Bonding in Tritantalum Oxide Clusters: Ta<sub>3</sub>O<sub>n</sub><sup>-</sup> and Ta<sub>3</sub>O<sub>n</sub> ( $n = 1-8$ ). *J. Phys. Chem. A* **2009**, *113*, 9804–9813.
- (S3) Pyykkö, P.; Atsumi, M. Molecular Double-Bond Covalent Radii for Elements Li–E112. *Chem. Eur. J.* **2009**, *15*, 12770–12779.

**Figure S1.** Optimized structures (distances in angstroms and angles in degrees) and their relative energies for  $\text{Re}_3\text{O}_3^-$  cluster.

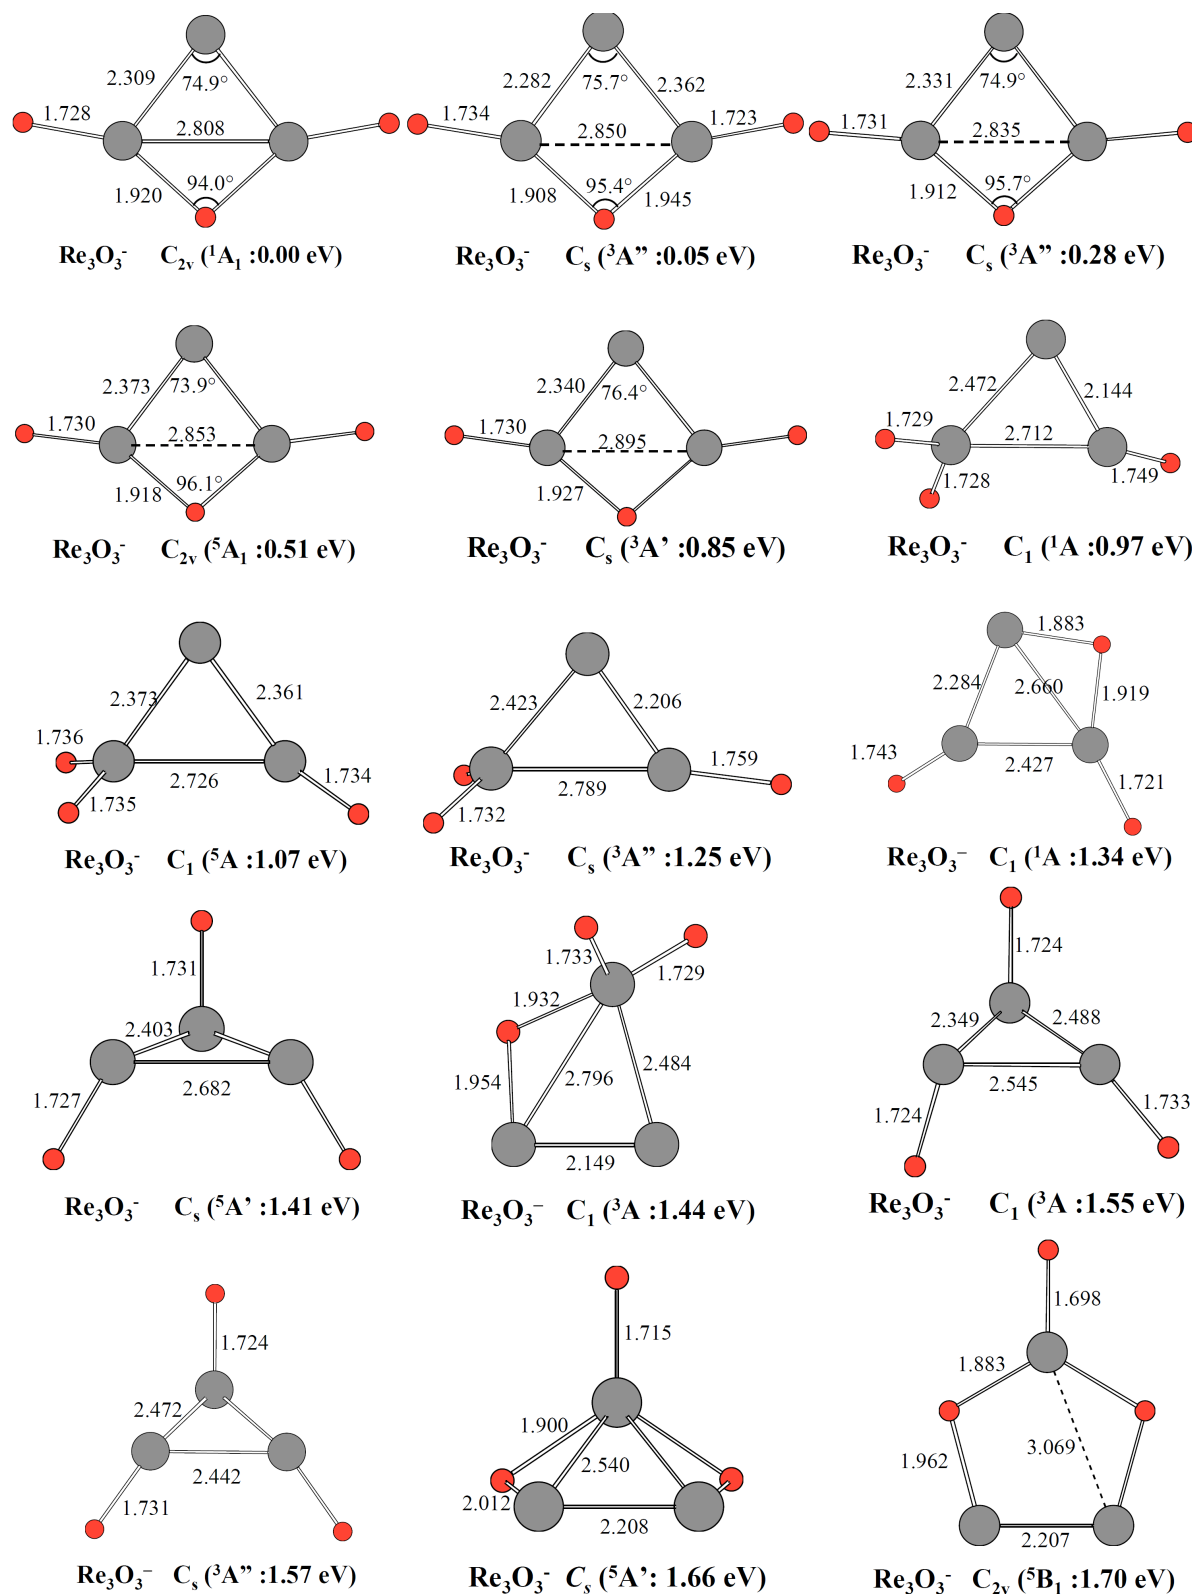

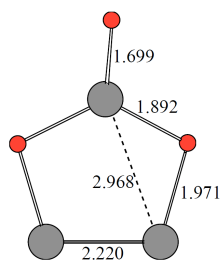

$\text{Re}_3\text{O}_3^-$   $C_s$  ( ${}^7A'$  :1.79 eV)

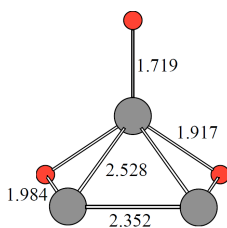

$\text{Re}_3\text{O}_3^-$   $C_s$  ( ${}^7A''$  :1.96 eV)

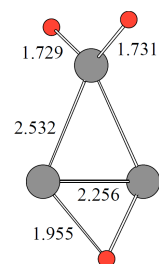

$\text{Re}_3\text{O}_3^-$   $C_1$  ( ${}^1A$  :2.05 eV)

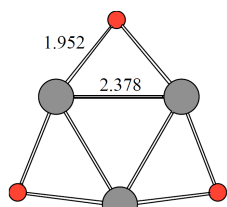

$\text{Re}_3\text{O}_3^-$   $C_{3v}$  ( ${}^3A_1$  :2.08 eV)

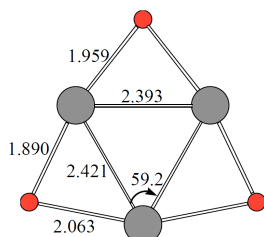

$\text{Re}_3\text{O}_3^-$   $C_s$  ( ${}^5A'$  :2.19 eV)

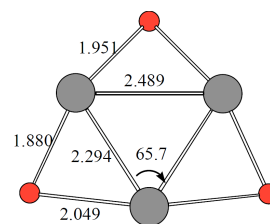

$\text{Re}_3\text{O}_3^-$   $C_s$  ( ${}^1A'$  :2.27 eV)

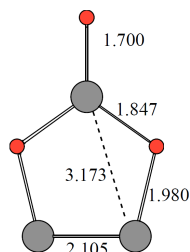

$\text{Re}_3\text{O}_3^-$   $C_{2v}$  ( ${}^3B_2$  :2.31 eV)

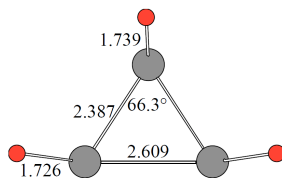

$\text{Re}_3\text{O}_3^-$   $C_s$  ( ${}^5A''$  :2.35 eV)

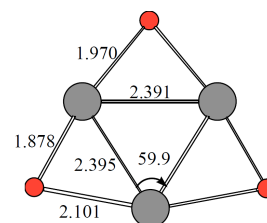

$\text{Re}_3\text{O}_3^-$   $C_{2v}$  ( ${}^5A_1$  :2.35 eV)

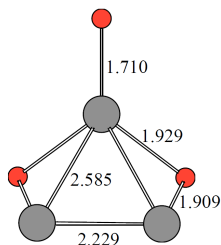

$\text{Re}_3\text{O}_3^-$   $C_s$  ( ${}^1A'$  :2.45 eV)

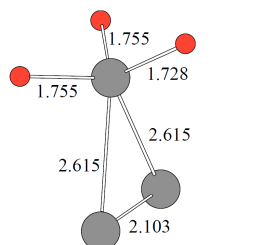

$\text{Re}_3\text{O}_3^-$   $C_s$  ( ${}^1A''$  :2.49 eV)

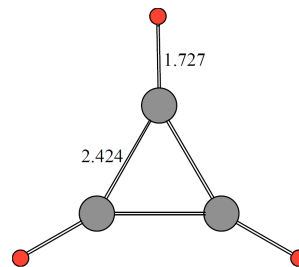

$\text{Re}_3\text{O}_3^-$   $D_{3h}$  ( ${}^3A_1'$  :3.06 eV)

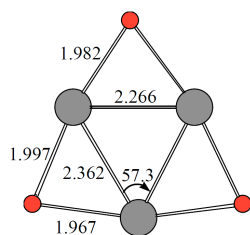

$\text{Re}_3\text{O}_3^-$   $C_{2v}$  ( ${}^1A_1$  :3.28 eV)

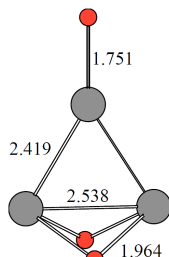

$\text{Re}_3\text{O}_3^-$   $C_{2v}$  ( ${}^5A_2$  :3.65 eV)

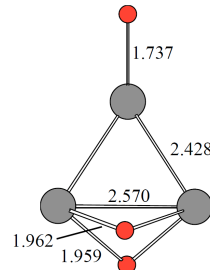

$\text{Re}_3\text{O}_3^-$   $C_s$  ( ${}^7A''$  :3.83 eV)

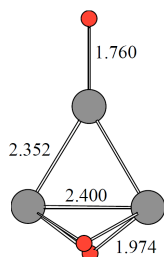

$\text{Re}_3\text{O}_3^-$   $C_{2v}$  ( ${}^1A_1$  :4.29 eV)

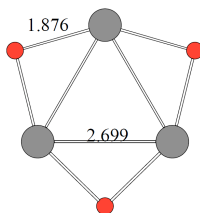

$\text{Re}_3\text{O}_3^-$   $D_{3h}$  ( ${}^1A_1'$  :5.36 eV)



**Figure S3.** Molecular orbital pictures for the  $\text{Re}_3\text{O}_3^- D_{3h} (^3A_1')$  structure, which lies 3.06 eV above the global minimum at B3LYP/Re/Stuttgart+2f1g/O/aug-cc-pVTZ level.

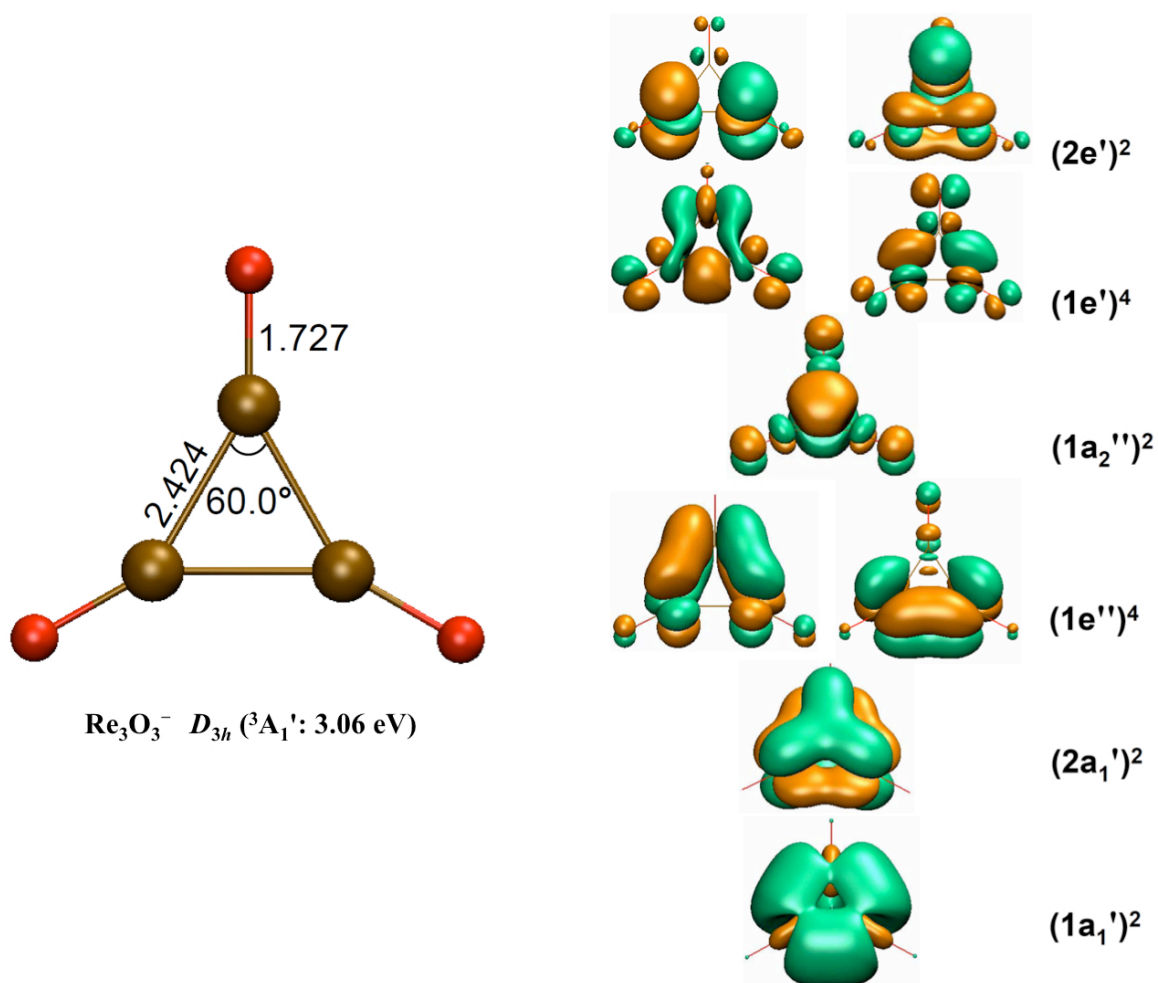

**Figure S4.** Molecular orbital pictures for the  $\text{Re}_3\text{O}_3^- D_{3h} (^1A_1')$  structure, which lies 5.36 eV above the global minimum at B3LYP/Re/Stuttgart+2f1g/O/aug-cc-pVTZ level.

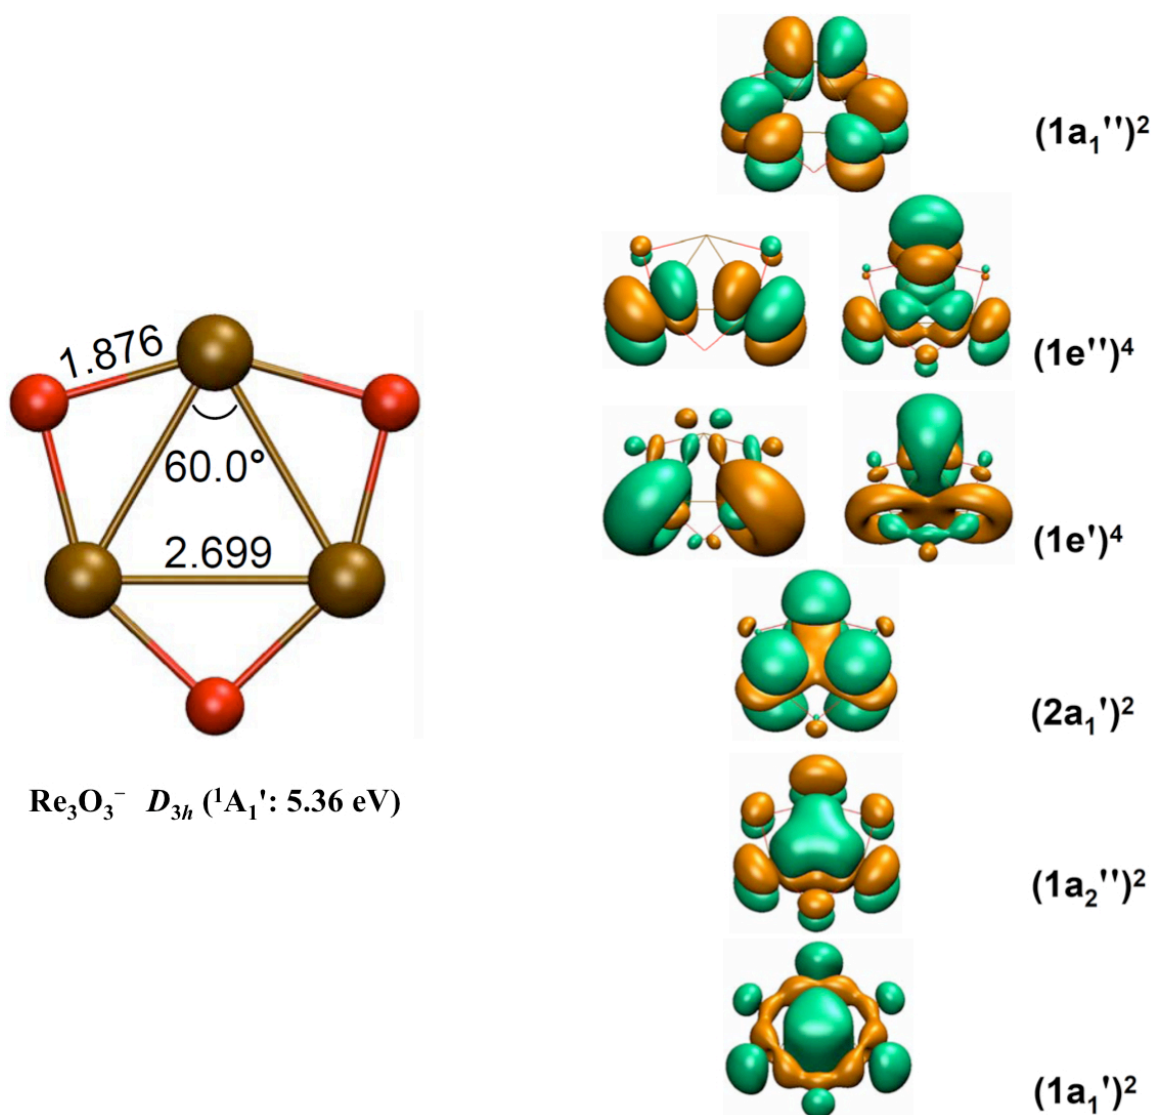



**Table S1.** Cartesian Coordinates for All Optimized Structures for  $\text{Re}_3\text{O}_3^-$  and  $\text{Re}_3\text{O}_3$  at B3LYP/Re/Stuttgart+2f1g/O/aug-cc-pVTZ Level.

**(a)  $\text{Re}_3\text{O}_3^-$**

|                                                       | x         | y         | z         |                                                    | x         | y         | z         |
|-------------------------------------------------------|-----------|-----------|-----------|----------------------------------------------------|-----------|-----------|-----------|
| $\text{Re}_3\text{O}_3^-$ ( $C_{2v} \ ^1A_1$ 0.00 eV) |           |           |           | O                                                  | -3.161163 | -0.289897 | 0.000000  |
| Re                                                    | 0.000000  | 1.403968  | -0.530269 | O                                                  | 3.161165  | -0.289914 | 0.000000  |
| Re                                                    | 0.000000  | 0.000000  | 1.302774  |                                                    |           |           |           |
| Re                                                    | 0.000000  | -1.403968 | -0.530269 | $\text{Re}_3\text{O}_3^-$ ( $C_1 \ ^1A$ 0.97 eV)   |           |           |           |
| O                                                     | 0.000000  | 0.000000  | -1.839219 | Re                                                 | -0.470287 | 1.264645  | 0.134883  |
| O                                                     | 0.000000  | 3.103265  | -0.215868 | Re                                                 | 1.452673  | -0.283574 | 0.016967  |
| O                                                     | 0.000000  | -3.103265 | -0.215868 | Re                                                 | -1.212081 | -0.706957 | -0.261339 |
|                                                       |           |           |           | O                                                  | -2.351042 | -1.415603 | 0.860504  |
| $\text{Re}_3\text{O}_3^-$ ( $C_s \ ^3A''$ 0.05 eV)    |           |           |           | O                                                  | 1.847366  | -1.411683 | 1.264570  |
| Re                                                    | -1.421112 | -0.481522 | 0.000000  | O                                                  | 2.657062  | 0.257466  | -1.098615 |
| Re                                                    | 0.000000  | 1.303898  | 0.000000  |                                                    |           |           |           |
| Re                                                    | 1.427331  | -0.578406 | 0.000000  | $\text{Re}_3\text{O}_3^-$ ( $C_1 \ ^5A$ 1.07 eV)   |           |           |           |
| O                                                     | -0.066257 | -1.824300 | 0.000000  | Re                                                 | -1.338828 | -0.468467 | 0.018076  |
| O                                                     | -3.122358 | -0.147669 | 0.000000  | Re                                                 | 1.376670  | -0.602294 | -0.173536 |
| O                                                     | 3.130307  | -0.315257 | 0.000000  | Re                                                 | 0.133185  | 1.392349  | 0.052840  |
|                                                       |           |           |           | o                                                  | -2.218265 | -0.727672 | -1.456399 |
| $\text{Re}_3\text{O}_3^-$ ( $C_s \ ^3A''$ 0.28 eV)    |           |           |           | o                                                  | -1.959280 | -0.976834 | 1.556340  |
| Re                                                    | 0.451255  | -0.270984 | 1.417659  | o                                                  | 2.574165  | -1.310382 | 0.862119  |
| Re                                                    | -1.144063 | 0.666436  | 0.000000  |                                                    |           |           |           |
| Re                                                    | 0.451255  | -0.270984 | -1.417659 | $\text{Re}_3\text{O}_3^-$ ( $C_s \ ^3A''$ 1.25 eV) |           |           |           |
| O                                                     | 1.362050  | -1.173570 | 0.000000  | Re                                                 | -0.811076 | 1.060054  | 0.000000  |
| O                                                     | 0.451255  | 0.003340  | 3.126534  | Re                                                 | 1.344133  | 0.587820  | 0.000000  |
| O                                                     | 0.451255  | 0.003340  | -3.126534 | Re                                                 | -0.653789 | -1.357718 | 0.000000  |
|                                                       |           |           |           | o                                                  | -0.811076 | -2.179861 | 1.515888  |
| $\text{Re}_3\text{O}_3^-$ ( $C_{2v} \ ^5A_1$ 0.51 eV) |           |           |           | o                                                  | -0.811076 | -2.179861 | -1.515888 |
| Re                                                    | 0.000000  | 1.426503  | -0.544321 | o                                                  | 2.754023  | 1.639511  | 0.000000  |
| Re                                                    | 0.000000  | 0.000000  | 1.352087  |                                                    |           |           |           |
| Re                                                    | 0.000000  | -1.426503 | -0.544321 | $\text{Re}_3\text{O}_3^-$ ( $C_1 \ ^1A$ 1.34 eV)   |           |           |           |
| O                                                     | 0.000000  | 0.000000  | -1.826916 | Re                                                 | -0.596135 | 1.136863  | -0.175702 |
| O                                                     | 0.000000  | 3.142620  | -0.321443 | Re                                                 | -1.077716 | -1.083283 | 0.065582  |
| O                                                     | 0.000000  | -3.142620 | -0.321443 | Re                                                 | 1.426319  | -0.184616 | 0.058328  |
|                                                       |           |           |           | O                                                  | 0.586282  | -1.861898 | -0.347943 |
| $\text{Re}_3\text{O}_3^-$ ( $C_s \ ^3A'$ 0.85 eV)     |           |           |           | O                                                  | -1.198126 | 2.443608  | 0.808479  |
| Re                                                    | -1.447446 | -0.528157 | 0.000000  | O                                                  | 2.932461  | 0.646760  | 0.025015  |
| Re                                                    | 0.000000  | 1.310229  | 0.000000  |                                                    |           |           |           |
| Re                                                    | 1.447445  | -0.528157 | 0.000000  |                                                    |           |           |           |
| O                                                     | 0.000001  | -1.800639 | 0.000000  |                                                    |           |           |           |

|                                                       |           |           |           |                                                       |           |           |           |
|-------------------------------------------------------|-----------|-----------|-----------|-------------------------------------------------------|-----------|-----------|-----------|
| $\text{Re}_3\text{O}_3^-$ ( $C_s$ $^5A'$ 1.41 eV)     |           |           |           | o                                                     | 0.000000  | -1.614716 | 0.763657  |
| Re                                                    | 0.626165  | -0.214533 | 1.341095  | o                                                     | 0.000000  | 1.614716  | 0.763657  |
| Re                                                    | -1.214662 | 0.551493  | 0.000000  | o                                                     | 0.000000  | 0.000000  | 3.430433  |
| Re                                                    | 0.626165  | -0.214533 | -1.341095 | $\text{Re}_3\text{O}_3^-$ ( $C_s$ $^7A'$ 1.79 eV)     |           |           |           |
| o                                                     | 0.626165  | -1.692650 | 2.234621  | Re                                                    | -0.232511 | 1.646780  | 0.000000  |
| o                                                     | 0.626165  | -1.692650 | -2.234621 | Re                                                    | 0.153093  | -1.079040 | 1.109981  |
| o                                                     | -1.605476 | 2.237534  | 0.000000  | Re                                                    | 0.153093  | -1.079040 | -1.109981 |
| $\text{Re}_3\text{O}_3^-$ ( $C_1$ $^3A$ 1.44 eV)      |           |           |           | o                                                     | 0.153093  | 0.814659  | -1.654747 |
| Re                                                    | -1.415711 | -0.207770 | -0.002278 | o                                                     | 0.153093  | 0.814659  | 1.654747  |
| Re                                                    | 0.623095  | 1.210083  | 0.030519  | o                                                     | -0.996877 | 3.164114  | 0.000000  |
| Re                                                    | 1.311376  | -0.825871 | 0.001013  | $\text{Re}_3\text{O}_3^-$ ( $C_s$ $^7A''$ 1.96 eV)    |           |           |           |
| O                                                     | -1.995948 | -0.647474 | 1.570394  | Re                                                    | -0.680542 | 1.159643  | 0.000000  |
| O                                                     | -2.561382 | 0.564593  | -1.041485 | Re                                                    | 0.420134  | -0.789182 | 1.175867  |
| O                                                     | -0.306056 | -1.571255 | -0.803166 | Re                                                    | 0.420134  | -0.789182 | -1.175867 |
| $\text{Re}_3\text{O}_3^-$ ( $C_1$ $^3A$ 1.55 eV)      |           |           |           | o                                                     | 0.420134  | 1.155136  | -1.569584 |
| Re                                                    | -0.877177 | -1.050805 | 0.268888  | o                                                     | 0.420134  | 1.155136  | 1.569584  |
| Re                                                    | -0.651127 | 1.240941  | -0.194502 | o                                                     | -2.337689 | 1.615249  | 0.000000  |
| Re                                                    | 1.429560  | -0.224486 | -0.162576 | $\text{Re}_3\text{O}_3^-$ ( $C_1$ $^3A$ 2.05eV)       |           |           |           |
| o                                                     | -1.530557 | -2.019108 | -0.999691 | Re                                                    | 1.433994  | 0.000000  | 0.022366  |
| o                                                     | 2.895011  | -0.036256 | 0.742118  | Re                                                    | -0.831774 | 1.127915  | -0.035621 |
| o                                                     | -0.438738 | 2.377397  | 1.084366  | Re                                                    | -0.831774 | -1.127915 | -0.035621 |
| $\text{Re}_3\text{O}_3^-$ ( $C_s$ $^3A''$ 1.57 eV)    |           |           |           | O                                                     | 2.264141  | -0.000001 | -1.494456 |
| Re                                                    | 1.167437  | 0.870382  | 0.000000  | O                                                     | 2.254404  | 0.000001  | 1.546973  |
| Re                                                    | -0.579372 | -0.381874 | 1.220937  | O                                                     | -2.366468 | 0.000000  | 0.405691  |
| Re                                                    | -0.579372 | -0.381874 | -1.220937 | $\text{Re}_3\text{O}_3^-$ ( $C_{3v}$ $^3A_1$ 2.08 eV) |           |           |           |
| O                                                     | 1.077241  | 2.591912  | 0.000000  | Re                                                    | 0.000000  | 1.373175  | -0.033261 |
| O                                                     | -0.579372 | -1.795798 | -2.220404 | Re                                                    | -1.189205 | -0.686588 | -0.033261 |
| O                                                     | -0.579372 | -1.795798 | 2.220404  | Re                                                    | 1.189205  | -0.686588 | -0.033261 |
| $\text{Re}_3\text{O}_3^-$ ( $C_s$ $^5A'$ 1.66 eV)     |           |           |           | o                                                     | 1.901356  | 1.097749  | 0.311819  |
| Re                                                    | -0.659568 | 1.207394  | 0.000000  | o                                                     | 0.000000  | -2.195497 | 0.311819  |
| Re                                                    | 0.409164  | -0.815395 | 1.103831  | o                                                     | -1.901356 | 1.097749  | 0.311819  |
| Re                                                    | 0.409164  | -0.815395 | -1.103831 | $\text{Re}_3\text{O}_3^-$ ( $C_s$ $^5A'$ 2.19 eV)     |           |           |           |
| o                                                     | 0.409164  | 1.142068  | -1.569627 | Re                                                    | -0.053829 | -0.691450 | 1.196394  |
| o                                                     | 0.409164  | 1.142068  | 1.569627  | Re                                                    | 0.157218  | 1.403012  | 0.000000  |
| o                                                     | -2.306704 | 1.685206  | 0.000000  | Re                                                    | -0.053829 | -0.691450 | -1.196394 |
| $\text{Re}_3\text{O}_3^-$ ( $C_{2v}$ $^5B_1$ 1.70 eV) |           |           |           | o                                                     | -0.356982 | -2.212616 | 0.000000  |
| Re                                                    | 0.000000  | 0.000000  | 1.732931  | o                                                     | -0.053829 | 1.012033  | -2.014944 |
| Re                                                    | 0.000000  | 1.103673  | -1.130879 | o                                                     | -0.053829 | 1.012033  | 2.014944  |
| Re                                                    | 0.000000  | -1.103673 | -1.130879 |                                                       |           |           |           |

|                                                       |           |           |           |                                                        |           |           |           |
|-------------------------------------------------------|-----------|-----------|-----------|--------------------------------------------------------|-----------|-----------|-----------|
| $\text{Re}_3\text{O}_3^-$ ( $C_s$ $^1A'$ 2.27 eV)     |           |           |           | O                                                      | 0.297036  | 2.071552  | 1.410430  |
| Re                                                    | -0.085768 | 1.276017  | 0.000000  | O                                                      | 0.297036  | 2.071552  | -1.410430 |
| Re                                                    | -0.001144 | -0.649271 | 1.244528  | O                                                      | -2.148590 | 1.483261  | 0.000000  |
| Re                                                    | -0.001144 | -0.649271 | -1.244528 | $\text{Re}_3\text{O}_3^-$ ( $D_{3h}$ $^3A_1'$ 3.06 eV) |           |           |           |
| o                                                     | -0.001144 | 1.056587  | -2.035880 | Re                                                     | 0.000000  | 1.399206  | 0.000000  |
| o                                                     | 0.827810  | -1.902002 | 0.000000  | Re                                                     | 1.211748  | -0.699603 | 0.000000  |
| o                                                     | -0.001144 | 1.056587  | 2.035880  | Re                                                     | -1.211748 | -0.699603 | 0.000000  |
| $\text{Re}_3\text{O}_3^-$ ( $C_{2v}$ $^3B_2$ 2.31 eV) |           |           |           | o                                                      | 0.000000  | 3.126660  | 0.000000  |
| Re                                                    | 0.000000  | 0.000000  | 1.817455  | o                                                      | -2.707767 | -1.563330 | 0.000000  |
| Re                                                    | 0.000000  | 1.052293  | -1.176329 | o                                                      | 2.707767  | -1.563330 | 0.000000  |
| Re                                                    | 0.000000  | -1.052293 | -1.176329 | $\text{Re}_3\text{O}_3^-$ ( $C_{2v}$ $^1A_1$ 3.28 eV)  |           |           |           |
| o                                                     | 0.000000  | -1.507770 | 0.750071  | Re                                                     | 0.000000  | 0.000000  | 1.383503  |
| o                                                     | 0.000000  | 1.507770  | 0.750071  | Re                                                     | 0.000000  | 1.132912  | -0.689097 |
| o                                                     | 0.000000  | 0.000000  | 3.517379  | Re                                                     | 0.000000  | -1.132912 | -0.689097 |
| $\text{Re}_3\text{O}_3^-$ ( $C_s$ $^5A''$ 2.35 eV)    |           |           |           | o                                                      | 0.000000  | -1.950984 | 1.132741  |
| Re                                                    | 1.300609  | 0.042268  | 0.000000  | o                                                      | 0.000000  | 0.000000  | -2.315255 |
| Re                                                    | -0.683760 | -0.200754 | 1.304654  | o                                                      | 0.000000  | 1.950984  | 1.132741  |
| Re                                                    | -0.683760 | -0.200754 | -1.304654 | $\text{Re}_3\text{O}_3^-$ ( $C_{2v}$ $^5A_2$ 3.65 eV)  |           |           |           |
| O                                                     | 1.994805  | 1.636828  | 0.000000  | Re                                                     | 0.000000  | 1.268869  | -0.688691 |
| O                                                     | -0.683760 | 0.865524  | -2.661830 | Re                                                     | 0.000000  | 0.000000  | 1.371110  |
| O                                                     | -0.683760 | 0.865524  | 2.661830  | Re                                                     | 0.000000  | -1.268869 | -0.688691 |
| $\text{Re}_3\text{O}_3^-$ ( $C_{2v}$ $^5A_1$ 2.35 eV) |           |           |           | o                                                      | -1.240393 | 0.000000  | -1.531606 |
| Re                                                    | 0.000000  | 0.000000  | 1.393391  | o                                                      | 1.240393  | 0.000000  | -1.531606 |
| Re                                                    | 0.000000  | 1.195497  | -0.681868 | o                                                      | 0.000000  | 0.000000  | 3.122020  |
| Re                                                    | 0.000000  | -1.195497 | -0.681868 | $\text{Re}_3\text{O}_3^-$ ( $C_s$ $^7A''$ 3.83 eV)     |           |           |           |
| o                                                     | 0.000000  | -2.061057 | 0.984800  | Re                                                     | -0.155951 | -0.663624 | 1.285141  |
| o                                                     | 0.000000  | 0.000000  | -2.247625 | Re                                                     | 0.406010  | 1.318069  | 0.000000  |
| o                                                     | 0.000000  | 2.061057  | 0.984800  | Re                                                     | -0.155951 | -0.663624 | -1.285141 |
| $\text{Re}_3\text{O}_3^-$ ( $C_s$ $^1A'$ 2.45 eV)     |           |           |           | o                                                      | 0.840471  | -1.755068 | 0.000000  |
| Re                                                    | -0.748127 | 1.194124  | 0.000000  | o                                                      | -1.566776 | -1.120664 | 0.000000  |
| Re                                                    | 0.450824  | -0.807148 | 1.114338  | o                                                      | -0.155951 | 2.961787  | 0.000000  |
| Re                                                    | 0.450824  | -0.807148 | -1.114338 | $\text{Re}_3\text{O}_3^-$ ( $C_{2v}$ $^1A_1$ 4.29 eV)  |           |           |           |
| o                                                     | 0.450824  | 1.061950  | -1.505050 | Re                                                     | 0.000000  | 1.199939  | -0.677833 |
| o                                                     | 0.450824  | 1.061950  | 1.505050  | Re                                                     | 0.000000  | 0.000000  | 1.345203  |
| o                                                     | -2.340905 | 1.815208  | 0.000000  | Re                                                     | 0.000000  | -1.199939 | -0.677833 |
| $\text{Re}_3\text{O}_3^-$ ( $C_s$ $^1A'$ 2.49 eV)     |           |           |           | o                                                      | -1.331727 | 0.000000  | -1.503500 |
| Re                                                    | -0.428256 | 1.321165  | 0.000000  | o                                                      | 1.331727  | 0.000000  | -1.503500 |
| Re                                                    | 0.297036  | -0.960655 | 1.051710  | o                                                      | 0.000000  | 0.000000  | 3.105083  |
| Re                                                    | 0.297036  | -0.960655 | -1.051710 |                                                        |           |           |           |

Re<sub>3</sub>O<sub>3</sub><sup>-</sup> (D<sub>3h</sub> <sup>1</sup>A<sub>1</sub> 5.36 eV)

|    |           |           |          |
|----|-----------|-----------|----------|
| Re | 0.000000  | 1.558476  | 0.000000 |
| Re | 1.349679  | -0.779238 | 0.000000 |
| Re | -1.349679 | -0.779238 | 0.000000 |
| o  | -1.802856 | 1.040879  | 0.000000 |
| o  | 0.000000  | -2.081759 | 0.000000 |
| o  | 1.802856  | 1.040879  | 0.000000 |

### (b) Re<sub>3</sub>O<sub>3</sub>

|                                                                                      | x        | y         | z         |
|--------------------------------------------------------------------------------------|----------|-----------|-----------|
| Re <sub>3</sub> O <sub>3</sub> (C <sub>2v</sub> <sup>2</sup> A <sub>1</sub> 0.00 eV) |          |           |           |
| Re                                                                                   | 0.000000 | 1.406000  | -0.525145 |
| Re                                                                                   | 0.000000 | 0.000000  | 1.288476  |
| Re                                                                                   | 0.000000 | -1.406000 | -0.525145 |
| O                                                                                    | 0.000000 | 0.000000  | -1.832466 |
| O                                                                                    | 0.000000 | 3.081623  | -0.200262 |
| O                                                                                    | 0.000000 | -3.081623 | -0.200262 |

|                                                                         |           |           |          |
|-------------------------------------------------------------------------|-----------|-----------|----------|
| Re <sub>3</sub> O <sub>3</sub> (C <sub>s</sub> <sup>4</sup> A" 0.30 eV) |           |           |          |
| Re                                                                      | -1.406889 | -0.453066 | 0.000000 |
| Re                                                                      | 0.000000  | 1.327910  | 0.000000 |
| Re                                                                      | 1.415142  | -0.623222 | 0.000000 |
| O                                                                       | -0.106570 | -1.830974 | 0.000000 |
| O                                                                       | -3.079309 | -0.078438 | 0.000000 |
| O                                                                       | 3.108510  | -0.449547 | 0.000000 |

|                                                                                      |          |           |           |
|--------------------------------------------------------------------------------------|----------|-----------|-----------|
| Re <sub>3</sub> O <sub>3</sub> (C <sub>2v</sub> <sup>4</sup> B <sub>1</sub> 0.48 eV) |          |           |           |
| Re                                                                                   | 0.000000 | 1.401998  | -0.539216 |
| Re                                                                                   | 0.000000 | 0.000000  | 1.338106  |
| Re                                                                                   | 0.000000 | -1.401998 | -0.539216 |
| O                                                                                    | 0.000000 | 0.000000  | -1.830578 |
| O                                                                                    | 0.000000 | 3.093576  | -0.301932 |
| O                                                                                    | 0.000000 | -3.093576 | -0.301932 |

|                                                                                      |          |           |           |
|--------------------------------------------------------------------------------------|----------|-----------|-----------|
| Re <sub>3</sub> O <sub>3</sub> (C <sub>2v</sub> <sup>4</sup> A <sub>2</sub> 0.49 eV) |          |           |           |
| Re                                                                                   | 0.000000 | 1.417064  | -0.534708 |
| Re                                                                                   | 0.000000 | 0.000000  | 1.302951  |
| Re                                                                                   | 0.000000 | -1.417064 | -0.534708 |
| O                                                                                    | 0.000000 | 0.000000  | -1.838965 |
| O                                                                                    | 0.000000 | 3.086394  | -0.175211 |

|   | x        | y         | z         |
|---|----------|-----------|-----------|
| O | 0.000000 | -3.086394 | -0.175211 |

|                                                                                      |          |           |           |
|--------------------------------------------------------------------------------------|----------|-----------|-----------|
| Re <sub>3</sub> O <sub>3</sub> (C <sub>2v</sub> <sup>4</sup> A <sub>1</sub> 1.01 eV) |          |           |           |
| Re                                                                                   | 0.000000 | 1.441400  | -0.533688 |
| Re                                                                                   | 0.000000 | 0.000000  | 1.327260  |
| Re                                                                                   | 0.000000 | -1.441400 | -0.533688 |
| O                                                                                    | 0.000000 | 0.000000  | -1.813079 |
| O                                                                                    | 0.000000 | 3.136665  | -0.311667 |
| O                                                                                    | 0.000000 | -3.136665 | -0.311667 |

|                                                                                      |          |           |           |
|--------------------------------------------------------------------------------------|----------|-----------|-----------|
| Re <sub>3</sub> O <sub>3</sub> (C <sub>2v</sub> <sup>2</sup> B <sub>1</sub> 0.83 eV) |          |           |           |
| Re                                                                                   | 0.000000 | 1.434753  | -0.519306 |
| Re                                                                                   | 0.000000 | 0.000000  | 1.256809  |
| Re                                                                                   | 0.000000 | -1.434753 | -0.519306 |
| O                                                                                    | 0.000000 | 0.000000  | -1.819969 |
| O                                                                                    | 0.000000 | 3.093323  | -0.112813 |
| O                                                                                    | 0.000000 | -3.093323 | -0.112813 |

|                                                                                      |          |           |           |
|--------------------------------------------------------------------------------------|----------|-----------|-----------|
| Re <sub>3</sub> O <sub>3</sub> (C <sub>2v</sub> <sup>2</sup> A <sub>2</sub> 0.93 eV) |          |           |           |
| Re                                                                                   | 0.000000 | 1.419047  | -0.523395 |
| Re                                                                                   | 0.000000 | 0.000000  | 1.299482  |
| Re                                                                                   | 0.000000 | -1.419047 | -0.523395 |
| O                                                                                    | 0.000000 | 0.000000  | -1.807975 |
| O                                                                                    | 0.000000 | 3.108654  | -0.280505 |
| O                                                                                    | 0.000000 | -3.108654 | -0.280505 |

|                                                                                      |          |          |           |
|--------------------------------------------------------------------------------------|----------|----------|-----------|
| Re <sub>3</sub> O <sub>3</sub> (C <sub>2v</sub> <sup>6</sup> A <sub>1</sub> 1.19 eV) |          |          |           |
| Re                                                                                   | 0.000000 | 1.457350 | -0.560025 |

|                                                                         |           |           |           |                                                                                      |           |           |           |
|-------------------------------------------------------------------------|-----------|-----------|-----------|--------------------------------------------------------------------------------------|-----------|-----------|-----------|
| Re                                                                      | 0.000000  | 0.000000  | 1.390707  | O                                                                                    | 0.117973  | 1.151095  | 1.848650  |
| Re                                                                      | 0.000000  | -1.457350 | -0.560025 |                                                                                      |           |           |           |
| O                                                                       | 0.000000  | 0.000000  | -1.811565 | Re <sub>3</sub> O <sub>3</sub> (C <sub>s</sub> <sup>4</sup> A" 1.81 eV)              |           |           |           |
| O                                                                       | 0.000000  | 3.151060  | -0.362924 | Re                                                                                   | -0.248178 | 1.369447  | 0.000000  |
| O                                                                       | 0.000000  | -3.151060 | -0.362924 | Re                                                                                   | 0.078959  | -0.680357 | 1.182501  |
|                                                                         |           |           |           | Re                                                                                   | 0.078959  | -0.680357 | -1.182501 |
| Re <sub>3</sub> O <sub>3</sub> (C <sub>1</sub> <sup>2</sup> A 1.63 eV)  |           |           |           | O                                                                                    | 0.078959  | 1.010310  | -1.988715 |
| Re                                                                      | -0.560699 | 1.275027  | 0.008553  | O                                                                                    | 0.688276  | -2.102487 | 0.000000  |
| Re                                                                      | 1.476960  | -0.230299 | 0.029988  | O                                                                                    | 0.078959  | 1.010310  | 1.988715  |
| Re                                                                      | -1.155747 | -0.800416 | -0.164550 |                                                                                      |           |           |           |
| O                                                                       | -2.263035 | -1.415897 | 1.001300  | Re <sub>3</sub> O <sub>3</sub> (C <sub>1</sub> <sup>2</sup> A 2.00 eV)               |           |           |           |
| O                                                                       | 2.156788  | -0.362801 | 1.595548  | Re                                                                                   | 1.527182  | -0.109708 | 0.011984  |
| O                                                                       | 2.351425  | -0.511719 | -1.415513 | Re                                                                                   | -0.848245 | 1.111968  | -0.117091 |
|                                                                         |           |           |           | Re                                                                                   | -1.179918 | -0.966418 | 0.097130  |
| Re <sub>3</sub> O <sub>3</sub> (C <sub>1</sub> <sup>4</sup> A 1.42 eV)  |           |           |           | O                                                                                    | 0.573007  | -1.553231 | -0.601933 |
| Re                                                                      | -0.472312 | 1.314751  | 0.053682  | O                                                                                    | 0.906410  | 1.429311  | 0.805145  |
| Re                                                                      | 1.425890  | -0.280779 | 0.020997  | O                                                                                    | 3.217282  | -0.212090 | -0.128427 |
| Re                                                                      | -1.213929 | -0.785785 | -0.211926 |                                                                                      |           |           |           |
| O                                                                       | -2.006718 | -1.364421 | 1.184984  | Re <sub>3</sub> O <sub>3</sub> (C <sub>2v</sub> <sup>4</sup> A <sub>2</sub> 2.03 eV) |           |           |           |
| O                                                                       | 2.122041  | -0.649579 | 1.540749  | Re                                                                                   | 0.000000  | 0.000000  | 1.773045  |
| O                                                                       | 2.325466  | -0.312748 | -1.439040 | Re                                                                                   | 0.000000  | 1.078546  | -1.147404 |
|                                                                         |           |           |           | Re                                                                                   | 0.000000  | -1.078546 | -1.147404 |
| Re <sub>3</sub> O <sub>3</sub> (C <sub>1</sub> <sup>6</sup> A 1.70 eV)  |           |           |           | O                                                                                    | 0.000000  | -1.567134 | 0.721686  |
| Re                                                                      | -0.351194 | 1.455962  | 0.075068  | O                                                                                    | 0.000000  | 1.567134  | 0.721686  |
| Re                                                                      | 1.362655  | -0.374433 | 0.006156  | O                                                                                    | 0.000000  | 0.000000  | 3.448156  |
| Re                                                                      | -1.260536 | -0.754656 | -0.198295 |                                                                                      |           |           |           |
| O                                                                       | -1.922870 | -1.758043 | 1.002543  | Re <sub>3</sub> O <sub>3</sub> (C <sub>1</sub> <sup>4</sup> A 2.89 eV)               |           |           |           |
| O                                                                       | 1.977161  | -0.849625 | 1.527410  | Re                                                                                   | 0.429365  | 1.249965  | -0.163039 |
| O                                                                       | 2.280789  | -0.456771 | -1.432410 | Re                                                                                   | 1.032562  | -1.007948 | -0.135590 |
|                                                                         |           |           |           | Re                                                                                   | -1.484182 | -0.343810 | -0.083071 |
| Re <sub>3</sub> O <sub>3</sub> (C <sub>s</sub> <sup>4</sup> A' 1.86 eV) |           |           |           | O                                                                                    | 1.379314  | 2.008947  | 1.041667  |
| Re                                                                      | 0.627875  | -0.170080 | 1.363721  | O                                                                                    | -2.527334 | 0.360019  | 1.046695  |
| Re                                                                      | -1.233774 | 0.482957  | 0.000000  | O                                                                                    | 1.356661  | -1.414650 | 1.490074  |
| Re                                                                      | 0.627875  | -0.170080 | -1.363721 |                                                                                      |           |           |           |
| O                                                                       | 0.627875  | -1.758122 | 1.957737  | Re <sub>3</sub> O <sub>3</sub> (C <sub>s</sub> <sup>4</sup> A' 3.66 eV)              |           |           |           |
| O                                                                       | 0.627875  | -1.758122 | -1.957737 | Re                                                                                   | 0.160198  | -0.681889 | 1.169324  |
| O                                                                       | -1.461772 | 2.177513  | 0.000000  | Re                                                                                   | -0.435097 | 1.347930  | 0.000000  |
|                                                                         |           |           |           | Re                                                                                   | 0.160198  | -0.681889 | -1.169324 |
| Re <sub>3</sub> O <sub>3</sub> (C <sub>s</sub> <sup>4</sup> A' 1.88 eV) |           |           |           | O                                                                                    | 1.709370  | -0.872661 | 0.000000  |
| Re                                                                      | -0.345518 | 1.356314  | 0.000000  | O                                                                                    | -0.794239 | -1.935426 | 0.000000  |
| Re                                                                      | 0.117973  | -0.689303 | 1.157623  | O                                                                                    | 0.160198  | 2.956667  | 0.000000  |
| Re                                                                      | 0.117973  | -0.689303 | -1.157623 |                                                                                      |           |           |           |
| O                                                                       | 0.117973  | 1.151095  | -1.848650 |                                                                                      |           |           |           |
| O                                                                       | 0.791292  | -2.093209 | 0.000000  |                                                                                      |           |           |           |
